# Supplementary material for: Impact of AIS Data Thinning on Ship Air Pollutant Emissions Inventories
Source: MDPI journal article supplement (doi:10.3390/atmos13071135), 2022-07-18
Supplement: s1 [file s1]

Archive with 1 entries (1 files):
- atmosphere-1764003-supplementary.pdf
